# Supplementary material for: Constructing WO3/TiO2 composite structure towards sufficient use of solar energy
Source: Royal Society of Chemistry journal article supplement (doi:10.1039/c0cc04770h), 2011-01-01
Supplement: c0cc04770h.pdf [file c0cc04770h.pdf]

## Supporting information

### **Constructing WO<sub>3</sub>/TiO<sub>2</sub> composite structure towards sufficient use of solar energy**

Dan Su,<sup>a</sup> Jingyu Wang,<sup>\*a</sup> Yupan Tang,<sup>a,b</sup> Cheng Liu,<sup>a</sup> Lifei Liu<sup>a</sup> and Xijiang Han<sup>a</sup>

<sup>a</sup> Department of Chemistry, Harbin Institute of Technology, Harbin 150001, People's Republic of China, <sup>b</sup> Department of Chemical and Biomolecular Engineering, National University of Singapore, 119260, Singapore

## Experimental Details:

**Preparation of WO<sub>3</sub>/TiO<sub>2</sub> colloids.** Colloidal WO<sub>3</sub> and TiO<sub>2</sub> nanoparticles in acidic aqueous solution were prepared with sodium tungstate and titanium tetra-n-butoxide as precursors. WO<sub>3</sub> was synthesized according to the literatures.<sup>2</sup> Briefly, Na<sub>2</sub>WO<sub>4</sub> (0.5790 g) was dissolved in 100 mL H<sub>2</sub>O and bubbled with N<sub>2</sub> for 15 min. Then 2.0 mL concentrated HCl was added dropwise into the solution without stirring and the white precipitate was washed by water at 0 °C under N<sub>2</sub> atmosphere.

The preparation of TiO<sub>2</sub> colloid was based on our previous report.<sup>7</sup> In a typical procedure, 3 mL titanium tetra-n-butoxide was dispersed in 25 mL absolute ethanol, and then the mixture was added dropwise into 30 mL water by dropping funnel under vigorous magnetic stirring. After complete addition by absolute ethanol washing, the suspension was heated to 70 °C while stirring for about 90 min. Then 70 mL HNO<sub>3</sub> solution was added to adjust the pH value (~ 1.0) and the mixture was kept on stirred at 70 °C for 4 h in airproof condition. For comparison, a series of colloidal WO<sub>3</sub>/TiO<sub>2</sub> systems were obtained via three ways as follows.

(i) Physical mixture. The WO<sub>3</sub> precipitate was dissolved in hot acidic solution under sonication to form semitransparent colloidal suspensions at first. The solvent (oxalic acid) was replaced by acetic acid (30 %), which possesses relatively lower ionic strength and has less influence on the stability of TiO<sub>2</sub> colloid. After addition of TiO<sub>2</sub> colloid, the two types of semiconductor were mixed with each other via magnetic stirring.

(ii) Ultrasonic dispersion. The WO<sub>3</sub> precipitate was uniformly dispersed in the TiO<sub>2</sub> colloid under ultrasonication to form a colloidal mixture.

(iii) Composite structure. Stoichiometric ratio of titanium tetra-n-butoxide and Na<sub>2</sub>WO<sub>4</sub> was dispersed in absolute ethanol. Thus the hydrolysis of Na<sub>2</sub>WO<sub>4</sub> occurred accompanying with the peptization of amorphous TiO<sub>2</sub> in nitric acid medium. By varying the amount of Na<sub>2</sub>WO<sub>4</sub>, WO<sub>3</sub>/TiO<sub>2</sub> nanocomposites with different molar percentage were produced and labeled with 4%, 8%, 16%, and 24% according to the nominal concentration of W.

Double-distilled water was used throughout the preparation of TiO<sub>2</sub> and the colloidal products were diluted to 100 mL in volumetric flask for further use.

**Characterization of WO<sub>3</sub>/TiO<sub>2</sub> composite.** All powder samples were obtained by adjusting pH value to about 7.0 when the sedimentation of colloid occurred. Then the precipitation was collected by centrifugation, washing and vacuum drying at 60 °C for 6 h. Finally, the products were milled into fine powders. X-ray photoelectron spectroscopy (XPS) measurements were performed with PHI 5700 ESCA system (Physic Electronics) using a monochromatic Mg source (Mg K $\alpha$  1253.6 eV, 200 W) and a standard peak of C1s (284.6 eV). Crystalline phases of the as-prepared powders were investigated by an X-ray diffraction method (XRD-6000 X-ray diffractometer (Shimadzu) with a Cu K $\alpha$  radiation source and a fixed power source (40 kV and 40 mA)). The samples were scanned over a range of 10-70°, which covers the main characteristic diffraction peaks of anatase TiO<sub>2</sub> and WO<sub>3</sub>. The morphology of the colloid TiO<sub>2</sub> nanoparticles were directly examined using transmission electron microscopy (TEM, FEI Tecnai G2 T20 S-Twin) operating at an accelerating voltage of 200 kV. As further evidence, high-resolution transmission electron microscopy (HRTEM) was employed and the corresponding fast Fourier transform (FFT) was obtained by Gatan Digital Micrograph software (Gatan Inc., America).

**Photocatalytic activity.** Photocatalytic activities of samples were determined by the

decomposition rate of methylene blue (MB) dye in an aqueous solution. A high-pressure 100 W mercury (Hg) lamp and a 500 W halogen lamp (Institute of Electric Light Source, Beijing) were used as UV-light and Vis-light source. A Pyrex vessel was filled with circulating water to cool the reaction system. While reacting with target pollutants (MB) under halogen lamp, a cutoff filter was settled to completely remove any radiation below 420 nm and to ensure illumination by visible light. At given time intervals, the mixture was sampled to analyze by a TU 1900 UV-vis spectrophotometer (Puxi Inc., Beijing) equipped with 1 cm quartz cell. Changes of UV-vis absorption spectra as well as values of maximum absorption versus irradiation time ( $A/A_0 \sim t$ ) were recorded, which reflected the decrease of dye concentration.

(1) UV pre-irradiation. 1 mL colloidal photocatalyst was diluted to 10.00 mL with water (pH ~ 2.0) and the mixture was irradiated for 4 h under UV-light.

(2) Comparison between dark reaction and visible photoactivity. After 4 h irradiation, 40  $\mu$ L 0.2% MB was added for degradation in the darkness (“dark reaction”, to evaluate the function of energy storage) or under halogen lamp with  $\lambda \geq 420$  nm (“visible irradiation”, to evaluate the Vis-light photoactivity). The mixture was kept under constant air-equilibrated conditions before and during the irradiation.

(3) Lasting of visible photoactivity. Attenuation of the Vis-light photoactivity was examined by tracking the MB degradation at given residence time ( $t_r$ ), which represented the period experienced in the darkness before reacting with MB dye. The value of  $t_r$  varied from 0 day to 10 days.

(4) Visible photoactivity with pre-irradiation by different UV/Vis proportion. Photocatalysts are pre-irradiated by mixed light (Hg lamp + halogen lamp) with fixed total intensity and UV/Vis proportion of 1/25, 1/12.5, 1/5, respectively. A 500 W Xenon (Xe) lamp was used for simulating solar light with UV/Vis of  $\sim 1/15$  (about 3% UV and 44% Vis). The subsequent visible photoactivity measurements were conducted following the same method as above (with pure UV pre-irradiation).

Important experimental details of special labels in the photocatalytic reaction are listed and compared in Table S1.

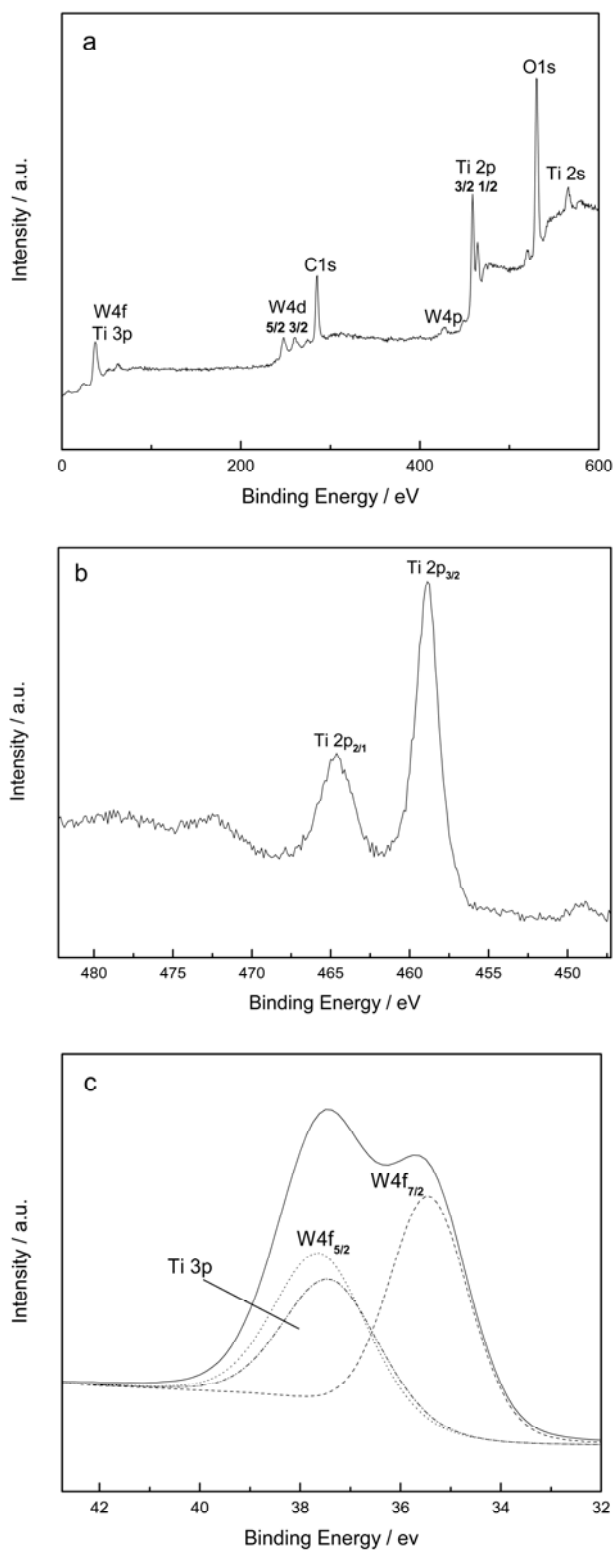

**Fig. S1** (a) XPS survey spectrum of the 16 % WO<sub>3</sub>/TiO<sub>2</sub> composite system; (b) High-resolution XPS spectrum of Ti 2p region; (c) simulated Gaussian line shapes in high-resolution spectrum of Ti 3p and W 4f regions.

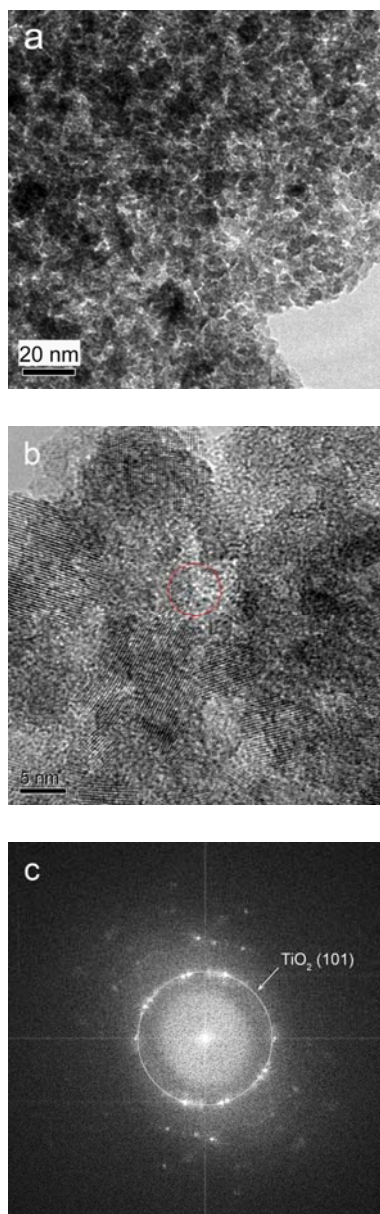

**Fig. S2** (a) TEM image of 16%  $\text{WO}_3/\text{TiO}_2$  nanocomposite at low resolution; (b) High-resolution TEM of 16%  $\text{WO}_3/\text{TiO}_2$  nanocomposite. Amorphous  $\text{WO}_3$  particles are indicated by red circle e; (c) The corresponding FFT pattern.

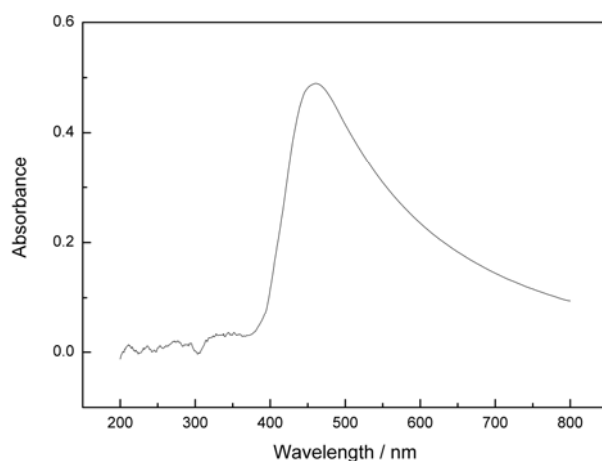

**Fig. S3** Absorption spectrum of  $\text{WO}_3/\text{TiO}_2$  composite colloid after 4 h UV-light irradiation. The reference solution is the pristine sample without UV-light pre-irradiation. Nominal concentration of Ti in the colloids, 8.81 mM; pH~1.0.

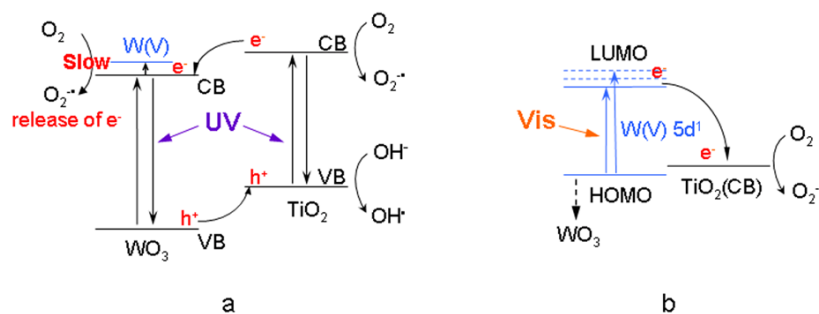

**Scheme S1** Scheme of electron transfer between  $\text{WO}_3$  and  $\text{TiO}_2$  under UV pre-irradiation (a) and the subsequent visible irradiation (b).

**Table S1** Comparison of experimental details in the photocatalytic reaction.

| process                                                      | I. pre-irradiation                |                                   | II. energy release<br>in the darkness | III. photocatalysis under<br>visible light |
|--------------------------------------------------------------|-----------------------------------|-----------------------------------|---------------------------------------|--------------------------------------------|
|                                                              | UV light                          | UV/Vis mixed<br>lights            |                                       |                                            |
| dark reaction                                                | WO <sub>3</sub> /TiO <sub>2</sub> | --                                | adding MB dye<br>for degradation      | --                                         |
| visible irradiation                                          | WO <sub>3</sub> /TiO <sub>2</sub> | --                                | --                                    | adding MB dye for<br>degradation           |
| visible irradiation<br>with given $t_r$<br>(residence time)* | WO <sub>3</sub> /TiO <sub>2</sub> | --                                | experiencing in<br>the darkness       | adding MB dye for<br>degradation           |
| mixed lights<br>pre-irradiation                              | --                                | WO <sub>3</sub> /TiO <sub>2</sub> | --                                    | adding MB dye for<br>degradation           |

\*Three parallel experiments are conducted for comparison, including natural attenuation, N<sub>2</sub> gas protection, and UV re-irradiation. Experiment of N<sub>2</sub> gas protection is introduced to remove the dissolved O<sub>2</sub> to delay energy release in process II. And that of UV re-irradiation is operated by repeating process I after process II.

**Table S2** WO<sub>3</sub> molar percentage of as-prepared samples.

| sample | WO <sub>3</sub> (mol %)     |                             |
|--------|-----------------------------|-----------------------------|
|        | N <sub>1</sub> <sup>a</sup> | N <sub>2</sub> <sup>b</sup> |
| 1      | 8%                          | 6.5%                        |
| 2      | 16%                         | 11.9%                       |
| 3      | 24%                         | 16.1%                       |

<sup>a</sup> N<sub>1</sub> as nominal value. <sup>b</sup> N<sub>2</sub> as value measured by XPS.
